# Supplementary material for: Gold as an intruder in ZnO nanowires
Source: Royal Society of Chemistry journal article supplement (doi:10.1039/c5cp01415h), 2015-01-01

## ***Schematic representation of angles***

**Au thread**

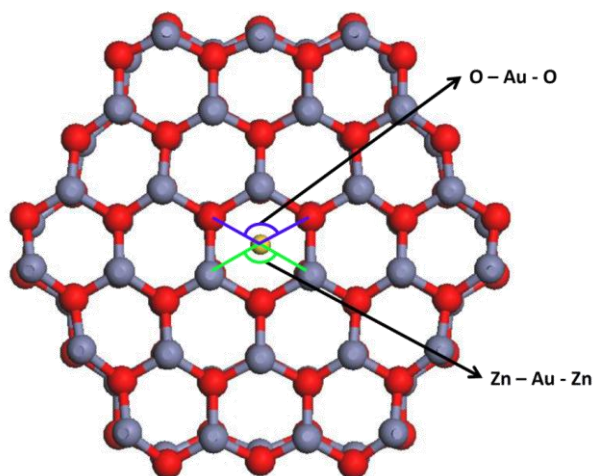

**Au in Zn site**

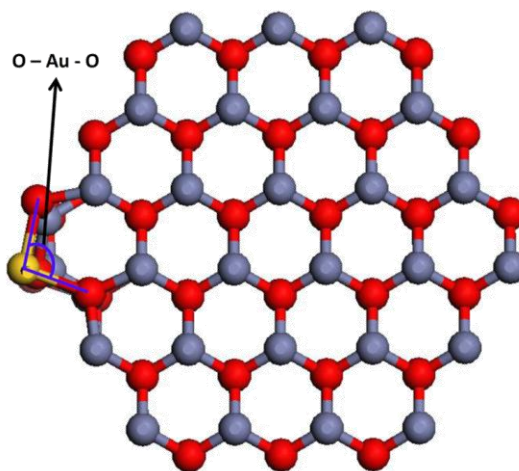

**Au Interstitial**

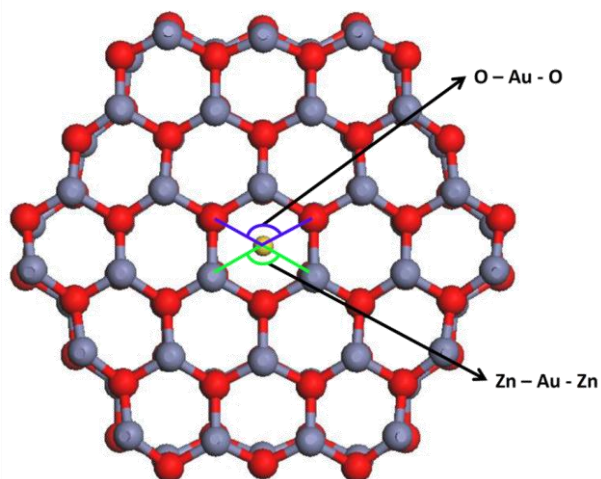

**Au in O site**

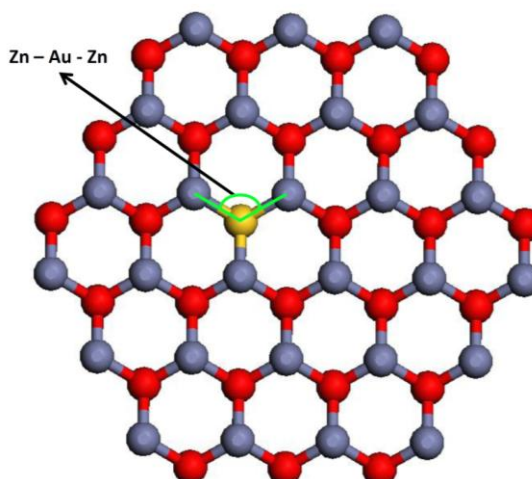

## ***Diameter of nanowire***

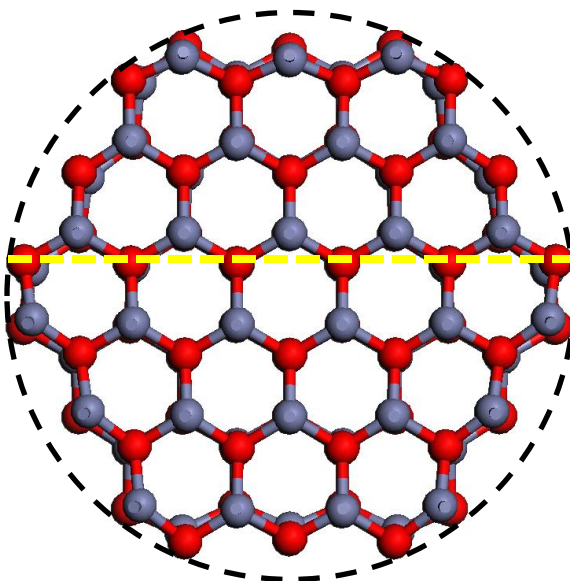

*HOMO*

*LUMO*

**ZnO NW**

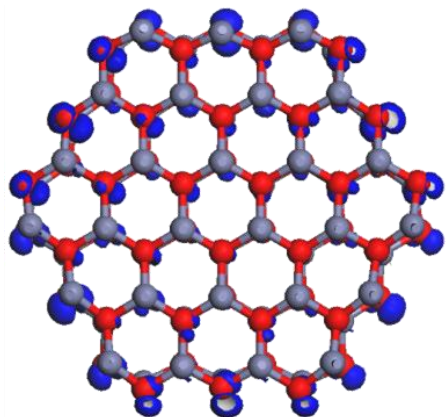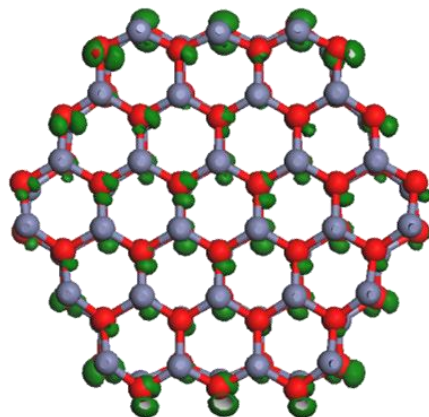

**Au<sub>c</sub><sup>th</sup>**

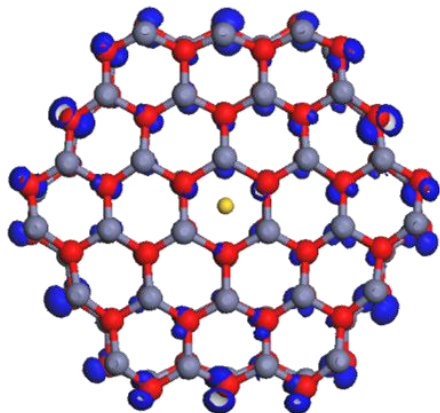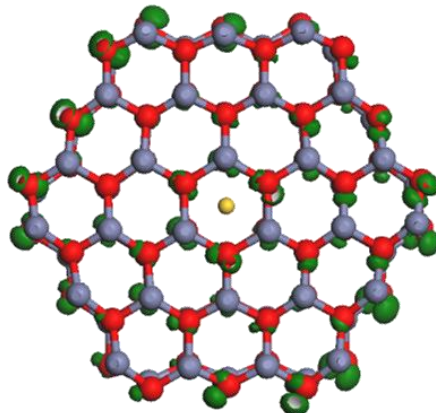

**Au<sub>m</sub><sup>th</sup>**

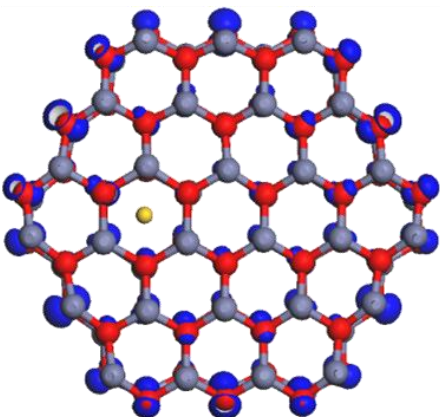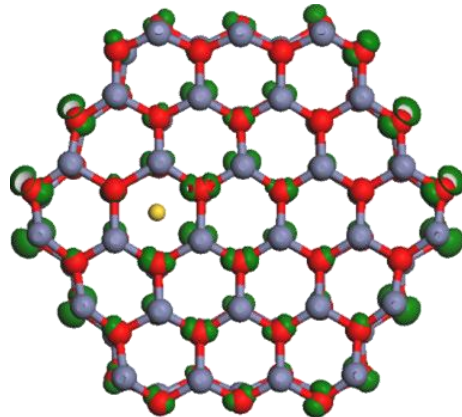

**Au<sub>s</sub><sup>th</sup>**

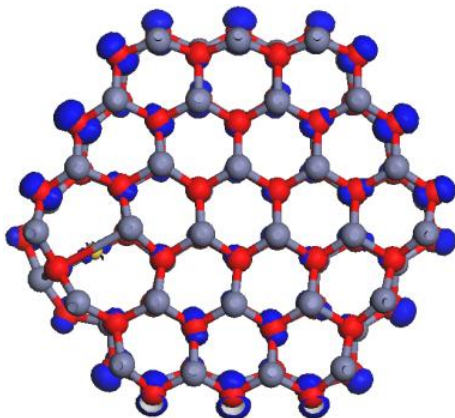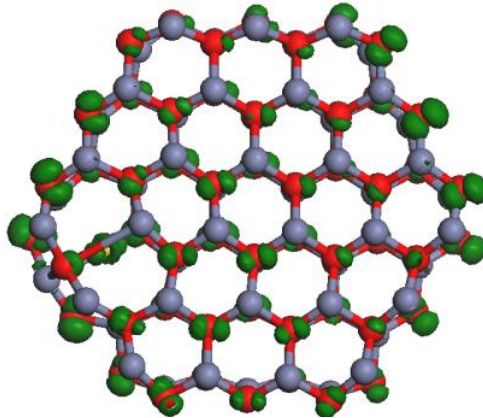



*HOMO*

*LUMO*

$\text{Au}_c^i$

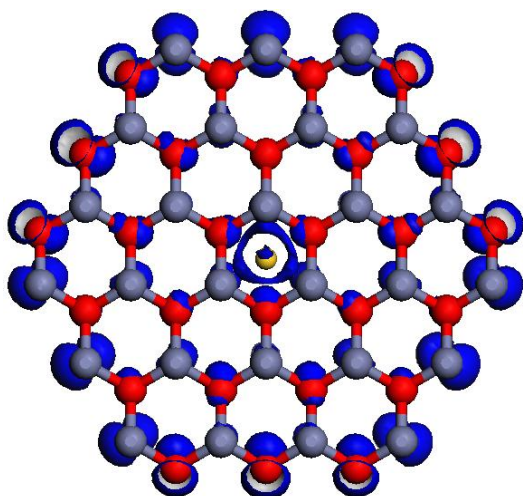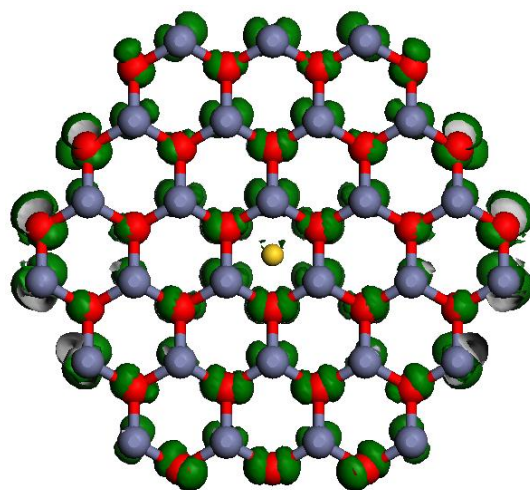

$\text{Au}_m^i$

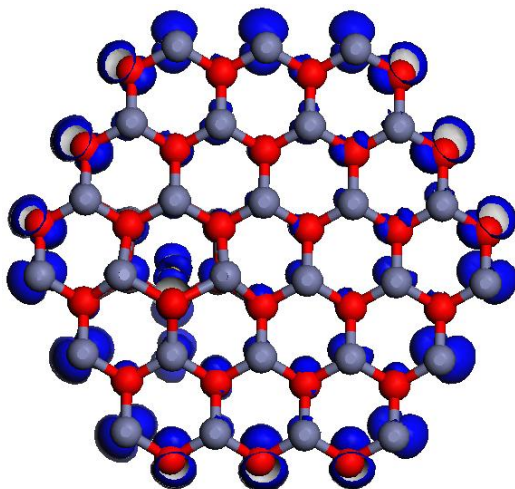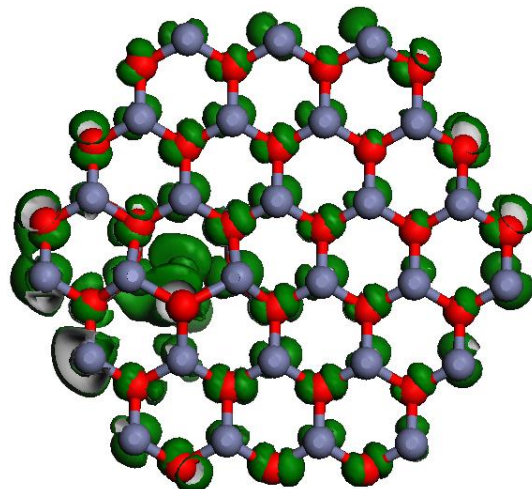

$\text{Au}_s^i$

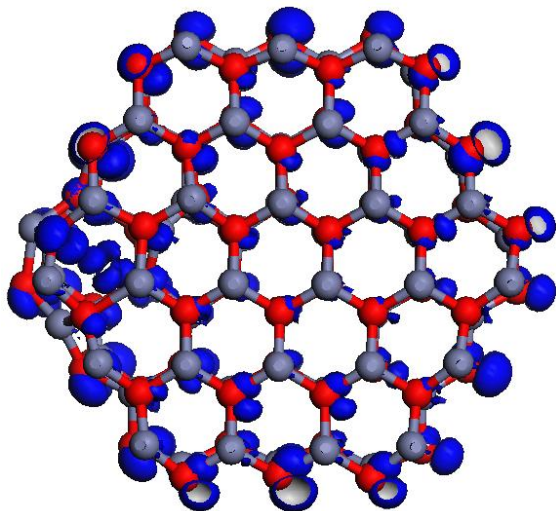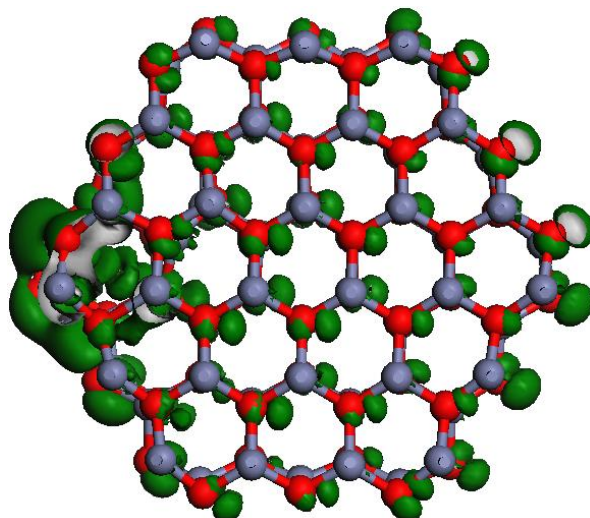

Supplement: c5cp01415h1.pdf [file c5cp01415h1.pdf]
